# Supplementary material
Source: PubMed Central journal article supplement (PMC6644102)
Supplement: ao8b01920_si_001.pdf [file ao8b01920_si_001.pdf]

## *Electronic Supporting Information*

# **Pyrene Bearing Azo-Functionalized Porous Nanofibers for CO<sub>2</sub> Separation and Toxic Metal Cation Sensing**

*Oussama M. El-Kadri<sup>†§\*</sup>, Tsemre-Dingel Tessema<sup>‡</sup>, Ruaa Almotawa<sup>⊥</sup>, Ravi K. Arvapally<sup>⊥</sup>,*

*Mohammad H. Al-Sayah<sup>†§</sup>, Mohammad A. Omary<sup>⊥+</sup>, and Hani M. El-Kaderi<sup>‡\*</sup>*

<sup>†</sup>Department of Biology, Chemistry, and Environmental Sciences, American University of Sharjah, PO Box 26666, Sharjah, United Arab Emirates

<sup>§</sup>Materials Science and Engineering Research Institute, American University of Sharjah, PO Box 26666, Sharjah, United Arab Emirates

<sup>‡</sup>Department of Chemistry, Virginia Commonwealth University, 1001 W. Main St., Richmond, Virginia 23284-2006, United States

<sup>⊥</sup>Department of Chemistry, University of North Texas, 1155 Union Circle #305070, Denton, TX 76203

<sup>+</sup> Institute of New Energy, Science Hall, 1003 Shangbu Road, Shenzhen 518031, China

*Correspondence:* oelkadri@aus.edu, +971 6 515-2787

helkaderi@vcu.edu, +1(804) 828-7505

## Table of Contents

**Figure S1:** FT-IR spectra of Azo-Py and tetra(4-amino)pyrene

**Figures S2:** Powder X-ray diffraction pattern of Azo-Py

**Figures S3:** BET plot of Azo-Py from N<sub>2</sub> isotherm at 77 K

**Figures S4:** Pore size distribution of Azo-Py from CO<sub>2</sub> isotherms at 273 K (pores with <0.7 nm in diameter)

**Figure S5 (a and b):** Initial slope determination of CO<sub>2</sub> and N<sub>2</sub> low pressure adsorption for CO<sub>2</sub>/N<sub>2</sub> selectivity calculations at 273 **(a)** and 298 K **(b)**

**Figure S5 (c and d):** Initial slope determination of CO<sub>2</sub> and CH<sub>4</sub> low pressure adsorption for CO<sub>2</sub>/CH<sub>4</sub> selectivity calculations at 273 **(c)** and 298 K **(d)**

**Figure S6.** Emission spectra of Azo-Py with successive additions of millimolar quantities of 0.1 M aluminum chloride.

**Figure S7.** Emission spectra of Azo-Py with successive additions of millimolar quantities of 0.1 M lead nitrate.

**Figure S8.** Emission spectra of Azo-Py with successive additions of millimolar quantities of 0.1 M thallium nitrate.

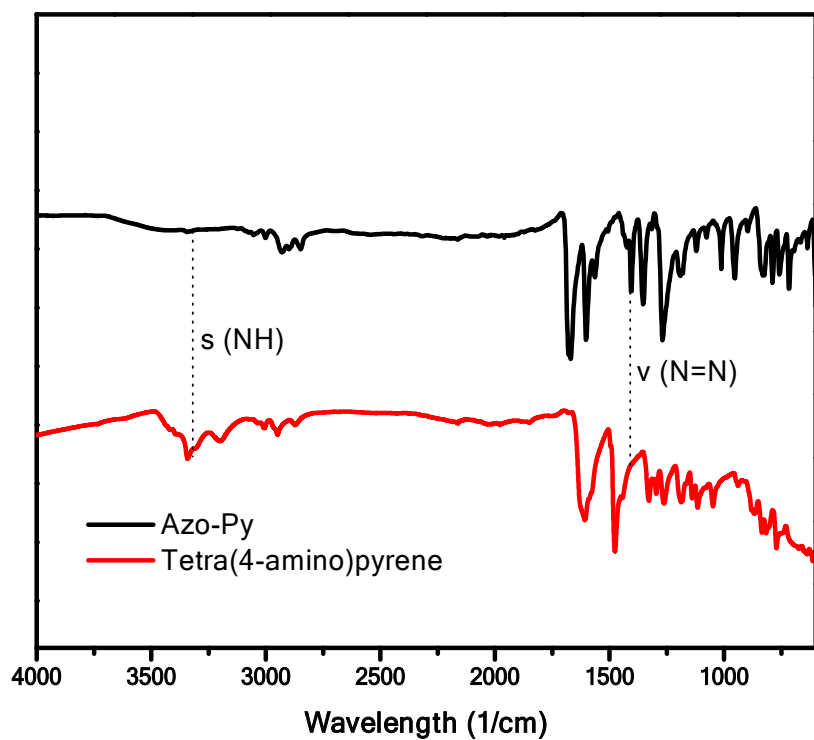

**Figure S1:** FT-IR spectra of of Azo-Py and tetra(4-amino)pyrene

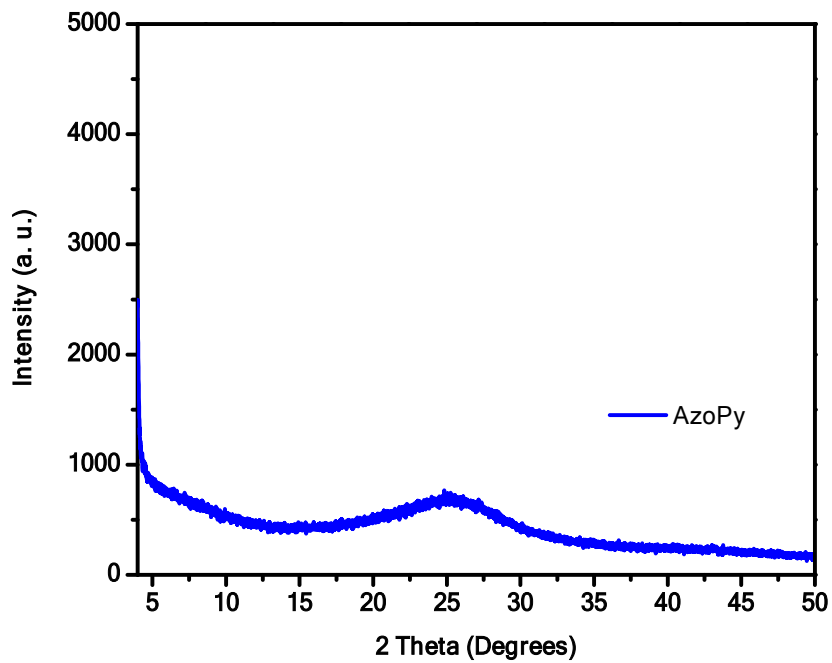

**Figure S2:** Powder X-ray diffraction patterns of Azo-Py

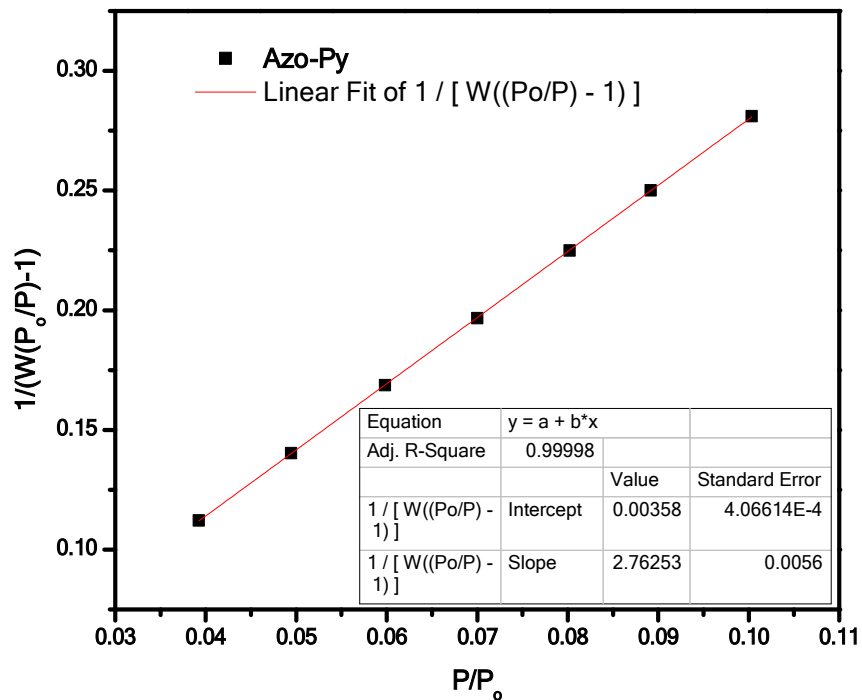

**Figure S3:** BET plot of Azo-Py from N<sub>2</sub> isotherm at 77 K

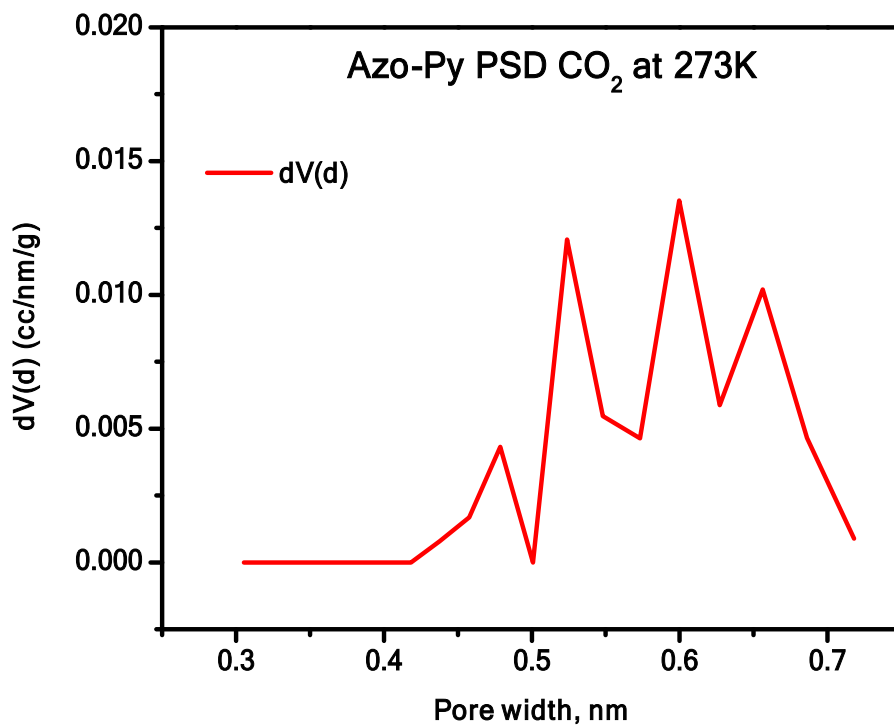

**Figure S4:** Pore size distribution of Azo-Py from CO<sub>2</sub> isotherms at 273 K (pores with <0.7 nm in diameter)

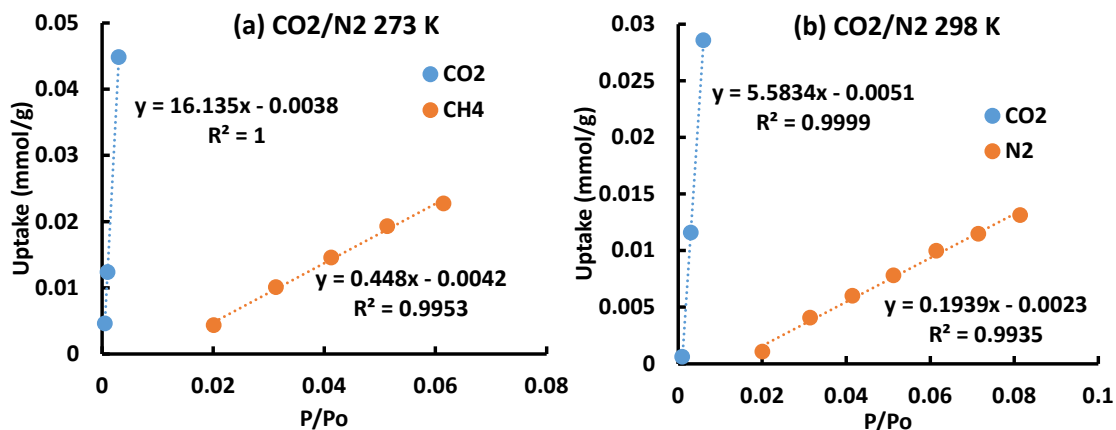

**Figure S5 (a and b):** Initial slope determination of CO<sub>2</sub> and N<sub>2</sub> low pressure adsorption for CO<sub>2</sub>/N<sub>2</sub> selectivity calculations at 273 (a) and 298 K (b)

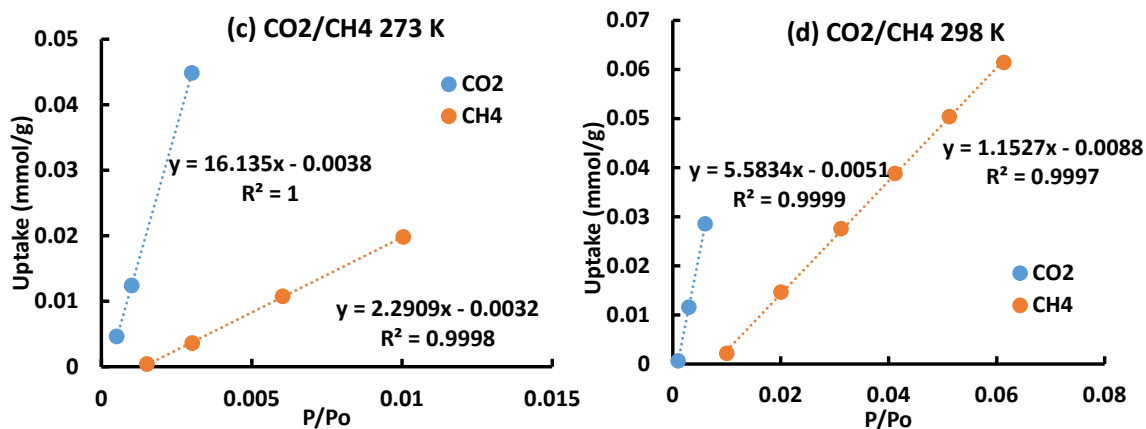

**Figure S5 (c and d):** Initial slope determination of CO<sub>2</sub> and CH<sub>4</sub> low pressure adsorption for CO<sub>2</sub>/CH<sub>4</sub> selectivity calculations at 273 (c) and 298 K (d)

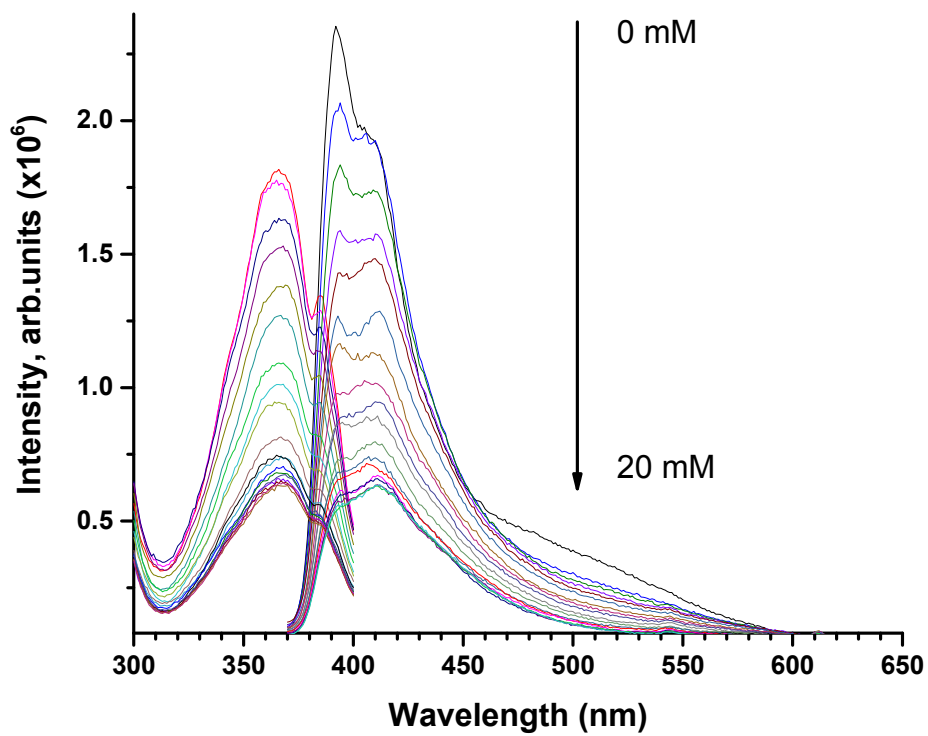

**Figure S6.** Emission spectra of Azo-Py with successive additions of millimolar quantities of 0.1 M aluminum chloride.

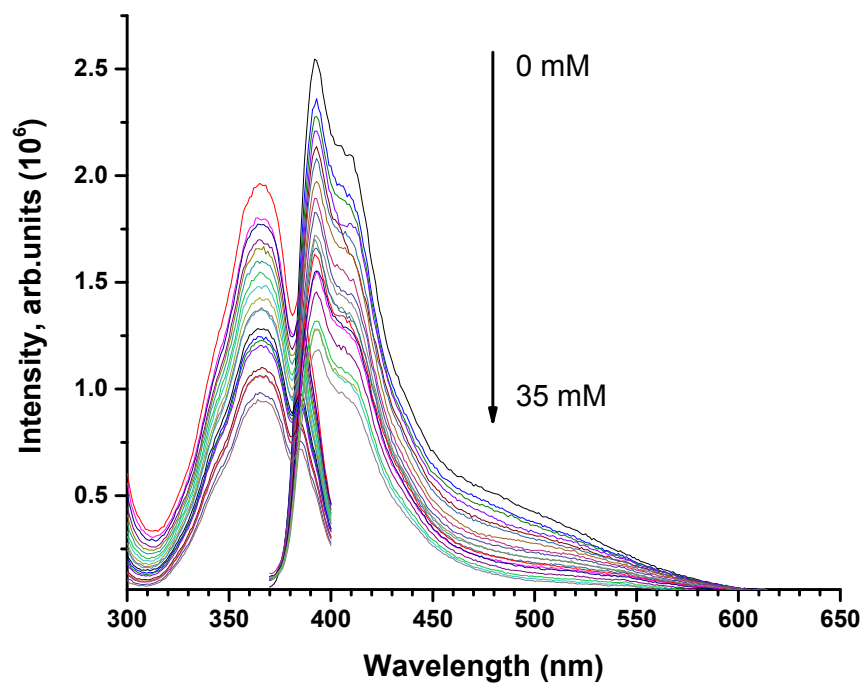

**Figure S7.** Emission spectra of Azo-Py with successive additions of millimolar quantities of 0.1 M lead nitrate.

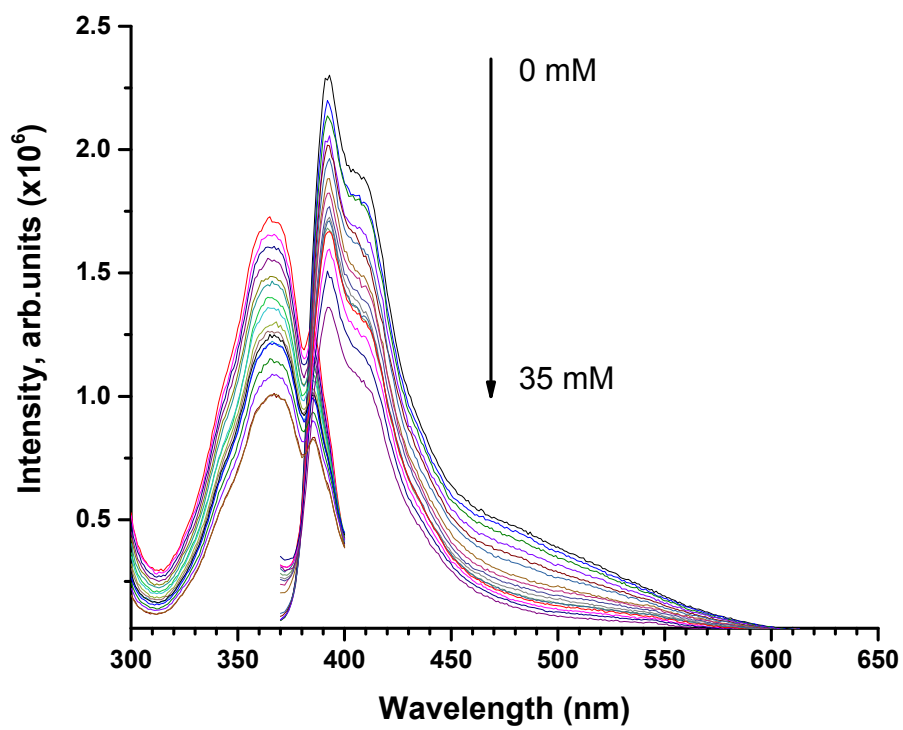

**Figure S8.** Emission spectra of Azo-Py with successive additions of millimolar quantities of 0.1 M thallium nitrate.
